# Supplementary material for: Quantitative multiparametric MRI predicts response to neoadjuvant therapy in the community setting
Source: Springer Nature journal article supplement (doi:10.1186/s13058-021-01489-6), 2021-11-27

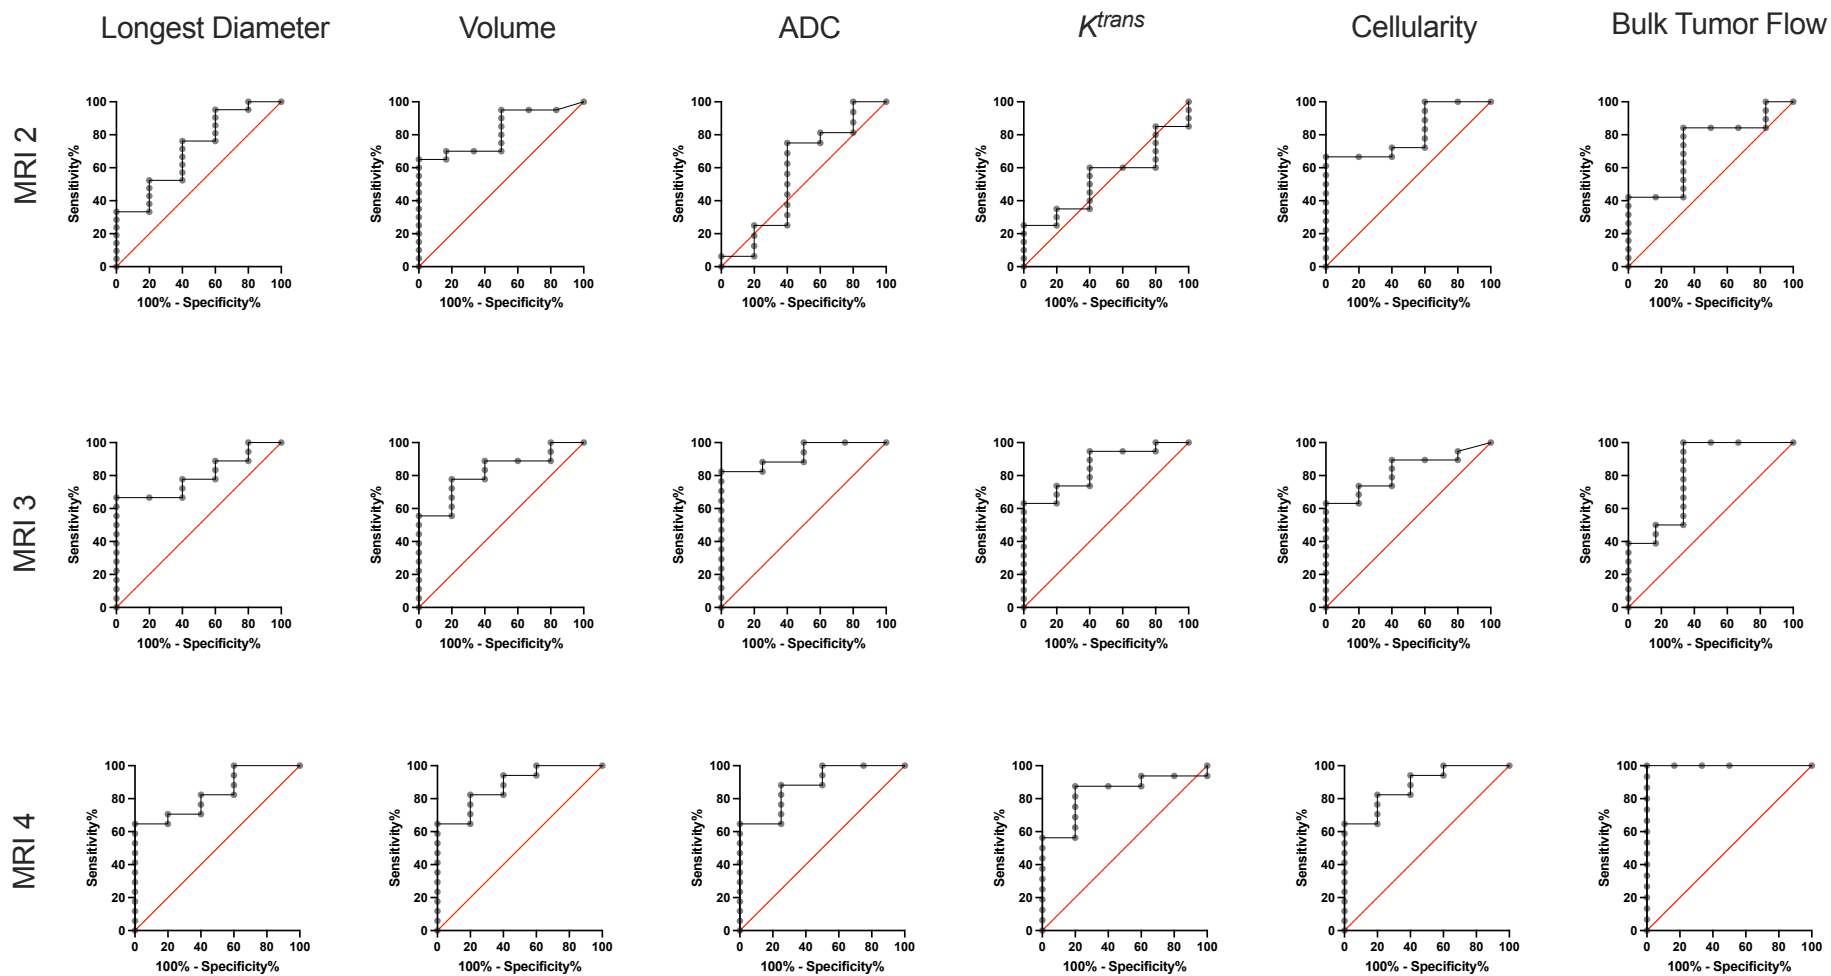

Supplement: MOESM2 [file 19907004]
